# Supplementary material for: Outer-sphere effects on the O2 sensitivity, catalytic bias and catalytic reversibility of hydrogenases
Source: Royal Society of Chemistry journal article supplement (doi:10.1039/d4sc00691g), 2024-01-01
Supplement: d4sc00691g1.pdf [file d4sc00691g1.pdf]

# Outer-sphere effects on the O<sub>2</sub> sensitivity, catalytic bias and catalytic reversibility of hydrogenases

## Supporting information

Andrea Fasano, Vincent Fourmond and Christophe Léger

Laboratoire de Bioénergétique et Ingénierie des Protéines. CNRS, Aix Marseille Université, UMR 7281. Marseille. France.

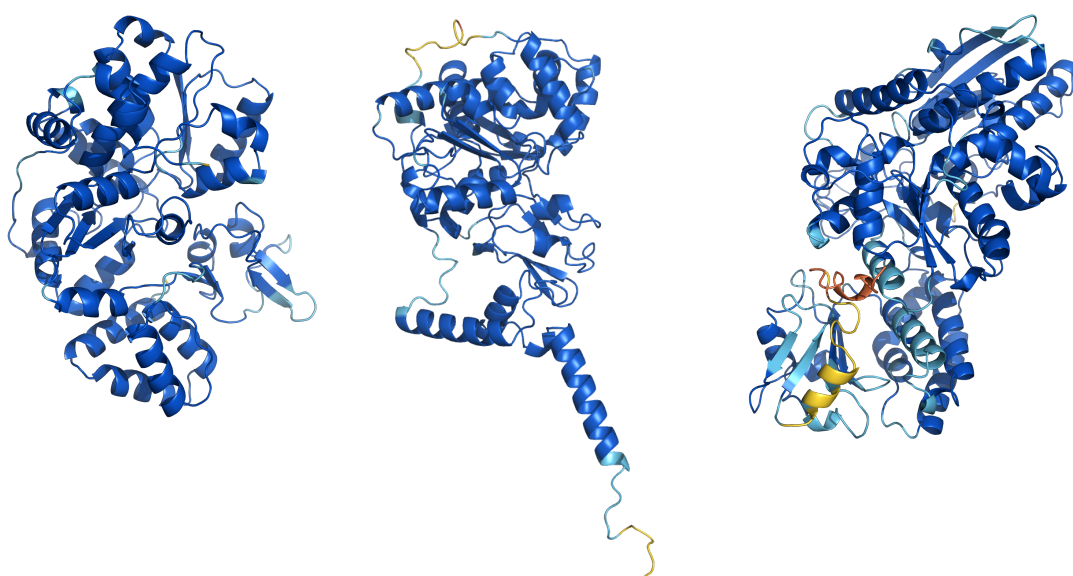

Figure S1: Confidence of the Alpha Fold models of CplII (left), Tam HydS (middle) and Cb (right). The structures are colored by the pLDDT (predicted local-distance difference) value: blue from 100 to 90 (high confidence); cyan from 90 to 70; yellow from 70 to 50 and orange below 50 (low confidence).
